# Supplementary material for: Enhancing CO2 hydrogenation to methanol via the synergistic effect of MoS2 interlayer spacing and sulfur vacancies
Source: Royal Society of Chemistry journal article supplement (doi:10.1039/d4ta02861a), 2024-01-01
Supplement: d4ta02861a1.pdf [file d4ta02861a1.pdf]

## Supplementary Information

### **Enhancing CO<sub>2</sub> hydrogenation to methanol via synergistic effect of MoS<sub>2</sub> interlayer spacing and sulfur vacancy**

**Langlang Qin<sup>a</sup>, Yunfei Gao<sup>\*b</sup>, Caiyun Han<sup>a</sup>, Minghui Zhu<sup>d</sup>, Shuang Wang<sup>\*a,c</sup>**

<sup>a</sup>. College of Environmental Science and Engineering, Taiyuan University of Technology, Jinzhong 030600, Shanxi, P.R. China.

<sup>b</sup>. Institute of Clean Coal Technology, East China University of Science and Technology, Shanghai 200237, P.R. China.

<sup>c</sup>. Shanxi Key Laboratory of Gas Energy Efficient and Clean Utilization, Taiyuan University of Technology, Taiyuan 030024, Shanxi, P.R. China.

<sup>d</sup>. State Key Laboratory of Chemical Engineering, School of Chemical Engineering, East China University of Science and Technology, Shanghai 200237, PR China

E-mail: [yunfeigao@ecust.edu.cn](mailto:yunfeigao@ecust.edu.cn)

[wangshuang@tyut.edu.cn](mailto:wangshuang@tyut.edu.cn)

## Materials

Sodium molybdenum oxide anhydrous ( $\text{Na}_2\text{MoO}_4$ ) was purchased from Aladdin. Thioacetamide ( $\text{C}_2\text{H}_5\text{NS}$ ), Hydrazine hydrate aqueous solution ( $\text{N}_2\text{H}_4 \cdot \text{H}_2\text{O}$ ), Ammonia liquor (25%,  $\text{NH}_3 \cdot \text{H}_2\text{O}$ ) and Sodium borohydride ( $\text{NaBH}_4$ ) were purchased from Sinopharm reagent Group Co., Ltd.

## Methods

**Synthesis of  $\text{MoS}_2\text{-NH}_3$ :** In a typical synthetic procedure, X mL ( $X = 25, 35.7$ , and  $50$ )  $\text{NH}_3 \cdot \text{H}_2\text{O}$  were added to 300 mg of the  $\text{MoS}_2$  samples and reacted for 3 h to obtain different S-vacancy concentrations. The resultant black precipitate was collected using centrifugation at 5000 rpm/min. Then, the collected material was vacuum-dried overnight at  $70^\circ\text{C}$ , named  $\text{MoS}_2\text{-NH}_3$ .

**Synthesis of  $\text{MoS}_2\text{-NaBH}_4$ :** Briefly, 300 mg of  $\text{MoS}_2$  samples and X mg ( $X = 38, 76$ , and  $760$ ) of  $\text{NaBH}_4$  were dissolved in 50 mL of deionized water to form a homogeneous transparent solution and reacted for 3 h to obtain different S-vacancy concentrations. The resultant black precipitate was collected using centrifugation at 5000 rpm/min. Then, the collected material was vacuum-dried overnight at  $70^\circ\text{C}$ , named  $\text{MoS}_2\text{-NaBH}_4$ .

## DFT calculations:

DFT calculations were performed using the Vienna Ab initio Simulation Package (VASP).<sup>1, 2</sup> The electron interaction energy of exchange correlation was described by using generalized gradient approximation (GGA) with the function of Perdew–Burke–Ernzerhof (PBE). The valence electrons were treated with a plane-wave basis sets with a cutoff kinetic energy of 400 eV. The Brillouin zone integration was sampled at the  $\Gamma$ -point for energy calculations and  $2 \times 2 \times 1$  Monkhorst–Pack mesh k-points for electronic structure analysis. The convergence criterion of force and energy were set as

0.03 eV/Å and  $1 \times 10^{-3}$  eV for all structural optimizations, respectively. The DFT-D3 correction method was employed to consider van der Waals interactions.<sup>3</sup> The monolayer model of MoS<sub>2</sub> ( $5 \times 5$ ) was used to construct the substrate with lattice parameters of  $a = b = 16.00$  Å. To prevent interactions between periodic structures, a 15 Å vacuum space was incorporated along the z-direction. All atoms were allowed to relax during the structural optimization process.

### **Material characterizations:**

The X-ray diffraction (XRD) patterns were obtained with X-ray diffractometer (Panalytical Aeris, Holland) operating at Cu K $\alpha$  radiation ( $\lambda = 1.5418$  Å). The X-ray photoelectron spectroscopy (XPS) measurements were performed by using an ESCALAB 250Xi electron spectrometer (Thermo Scientific Corporation) with monochromatic 150 W Al K $\alpha$  radiation. The morphology and structure of the samples were investigated by field-emission scanning electron microscopy (FESEM; SU8010, Japan). Transmission electron microscopy (TEM) with energy dispersive X-ray spectroscopy (EDS) and high-resolution TEM (HRTEM) results were obtained using a JEM-2100F electron microscope with an accelerating voltage of 200 kV. Raman spectra were obtained on a Renishaw InVia Raman spectrometer with the 514 nm excitation line of an Ar ion laser.

Temperature-programmed CO<sub>2</sub> desorption (CO<sub>2</sub>-TPD): CO<sub>2</sub>-TPD were carried out using a Micromeritics AutoChem II 2920 chemisorption instrument. During the CO<sub>2</sub>-TPD, approximately 50 mg of sample was first pretreated under He flow ( $30 \text{ mL} \cdot \text{min}^{-1}$ ) at 150 °C for 1 h. The sample was subsequently heated to 300 °C and purged for 3 h with 10% H<sub>2</sub>/Ar mixture at a flow rate of  $30 \text{ mL min}^{-1}$  to fully reduce the catalysts and then cooled to 50 °C. The sample was purged with 10% CO<sub>2</sub>/He mixture ( $30 \text{ mL} \cdot \text{min}^{-1}$ ) for 1.5 h at 50 °C to saturate the surface, then purged in flowing He ( $30 \text{ mL} \cdot \text{min}^{-1}$ ) for

1 h to remove physically adsorbed CO<sub>2</sub>. Subsequently, the temperature was elevated in flowing He (30 mL·min<sup>-1</sup>) until up to 900 °C at a ramp rate of 10 °C·min<sup>-1</sup>. CO<sub>2</sub> desorption amount was quantitatively measured based on CO<sub>2</sub> single-pulse experiment.

Brunauer–Emmett–Teller surface area measurements were performed on a V-Sprb 4804TP Surface Area Analyzer. Prior to N<sub>2</sub> adsorption, the samples were degassed under vacuum at 120 °C for 6h.

### **Catalytic tests:**

The catalyst performance was evaluated on a continuous fixed reaction bed. First of all, 0.3 g catalyst were loaded into a stainless steel reaction tube, and filled with quartz sand of equal size up and down. Typically, before the reaction, catalyst was pretreated in situ with 30 mL min<sup>-1</sup> H<sub>2</sub> at 1 bar and 300 °C for 3 h. After the reduction, the reactant was introduced into the reactor. The reactions were performed under a pressure of 30 or 50 bar and in a temperature range from 180 to 260 °C, with a H<sub>2</sub>/CO<sub>2</sub> ratio of 3:1 and GHSVs from 8000 to 16000 ml g<sub>cat.</sub><sup>-1</sup> h<sup>-1</sup>. The products were analyzed using an online gas chromatograph equipped with a thermal conductivity detector (TCD) and a flame ionization detector (FID). A TDX-01 packed column was connected to the TCD and an RT-Q-BOND-PLOT capillary column was connected to the FID. Product selectivity was calculated on a molar carbon basis. The catalytic performances during the stable phase of the reaction were typically used for discussion.

The reaction parameters including CO<sub>2</sub> conversion, product selectivity, and methanol space-time yield (STY<sub>CH<sub>3</sub>OH</sub>) were calculated as follows

$$CO_2 \text{ conversion } \% = \frac{n_{CO_2, in} - n_{CO_2, out}}{n_{CO_2, in}} \times 100$$

$$product\ selectivity\ \% = \frac{n_{product}}{\sum n_{product}} \times 100$$

$$STY_{CH_3OH} (g \cdot g_{cat}^{-1} \cdot h^{-1}) \\ = n_{CH_3OH} \times \frac{M_{CH_3OH}}{m_{MoS_2}} \times 60 (min\ h^{-1}) \times 0.001 (mol\ mmol^{-1})$$

where  $n_{CO_2, in}$  and  $n_{CO_2, out}$  are the amounts of  $CO_2$  (mol) at the inlet and outlet of the reactor and  $n_{product}$  is the amount of product (mol) at the outlet of the reactor.  $m_{MoS_2}$  is the weight of  $MoS_2$  in the catalyst (g), and  $M_{CH_3OH}$  is the molecular weight of methanol ( $32.04\ g \cdot mol^{-1}$ ).

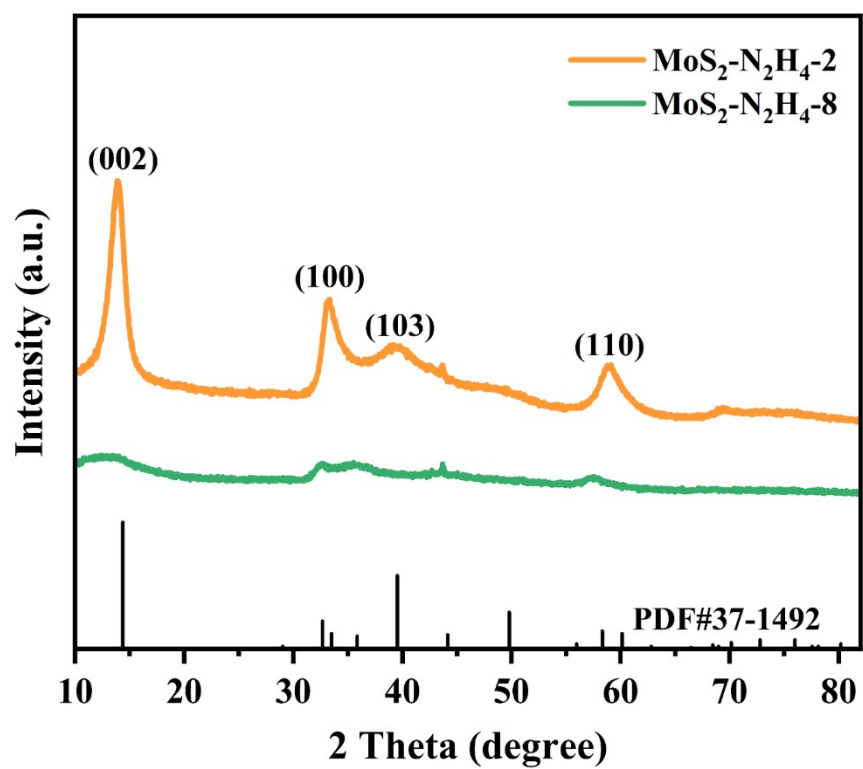

**Fig. S1.** XRD patterns of  $\text{MoS}_2\text{-N}_2\text{H}_4\text{-8}$ ,  $\text{MoS}_2\text{-NH}_3$  and  $\text{MoS}_2\text{-NaBH}_4$  catalysts.

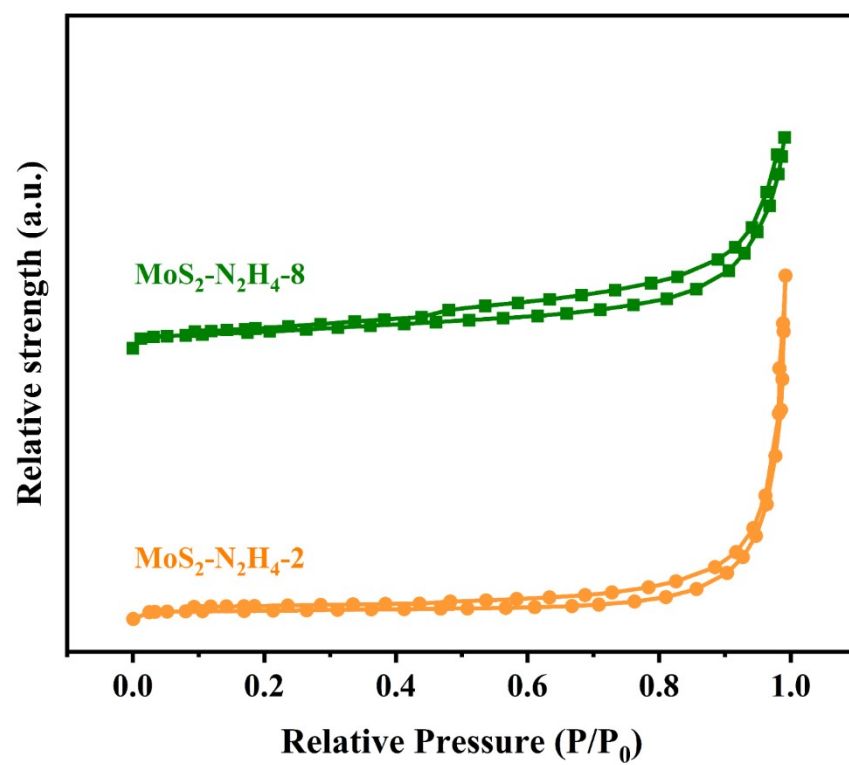

**Fig.S2.** N<sub>2</sub> adsorption-desorption isotherms of MoS<sub>2</sub>-N<sub>2</sub>H<sub>4</sub>-2, MoS<sub>2</sub>-N<sub>2</sub>H<sub>4</sub>-8 catalysts.

**Table S1**

Specific surface area and particle size of MoS<sub>2</sub>, MoS<sub>2</sub>-N<sub>2</sub>H<sub>4</sub>-2, MoS<sub>2</sub>-N<sub>2</sub>H<sub>4</sub>-4, MoS<sub>2</sub>-N<sub>2</sub>H<sub>4</sub>-8, MoS<sub>2</sub>-NH<sub>3</sub> and MoS<sub>2</sub>-NaBH<sub>4</sub> catalysts.

| Catalysts                                          | Specific surface<br>area (m <sup>2</sup> /g) | Particle size<br>(nm) <sup>a</sup> | d(002)<br>(nm) <sup>b</sup> |
|----------------------------------------------------|----------------------------------------------|------------------------------------|-----------------------------|
| MoS <sub>2</sub>                                   | 16.078                                       | 3.75                               | 0.642                       |
| MoS <sub>2</sub> -N <sub>2</sub> H <sub>4</sub> -2 | 21.889                                       | 1.79                               | 0.713                       |
| MoS <sub>2</sub> -N <sub>2</sub> H <sub>4</sub> -4 | 26.1175                                      | 0.86                               | 0.728                       |
| MoS <sub>2</sub> -N <sub>2</sub> H <sub>4</sub> -8 | 30.054                                       | 2.14                               | 0.730                       |
| MoS <sub>2</sub> -NH <sub>3</sub>                  | 37.4748                                      | 3.43                               | 0.734                       |
| MoS <sub>2</sub> -NaBH <sub>4</sub>                | 26.545                                       | 1.04                               | 0.635                       |

<sup>a</sup> calculated by Scherrer equation using XRD data.

<sup>b</sup> calculated by Bragg's Law using XRD data.

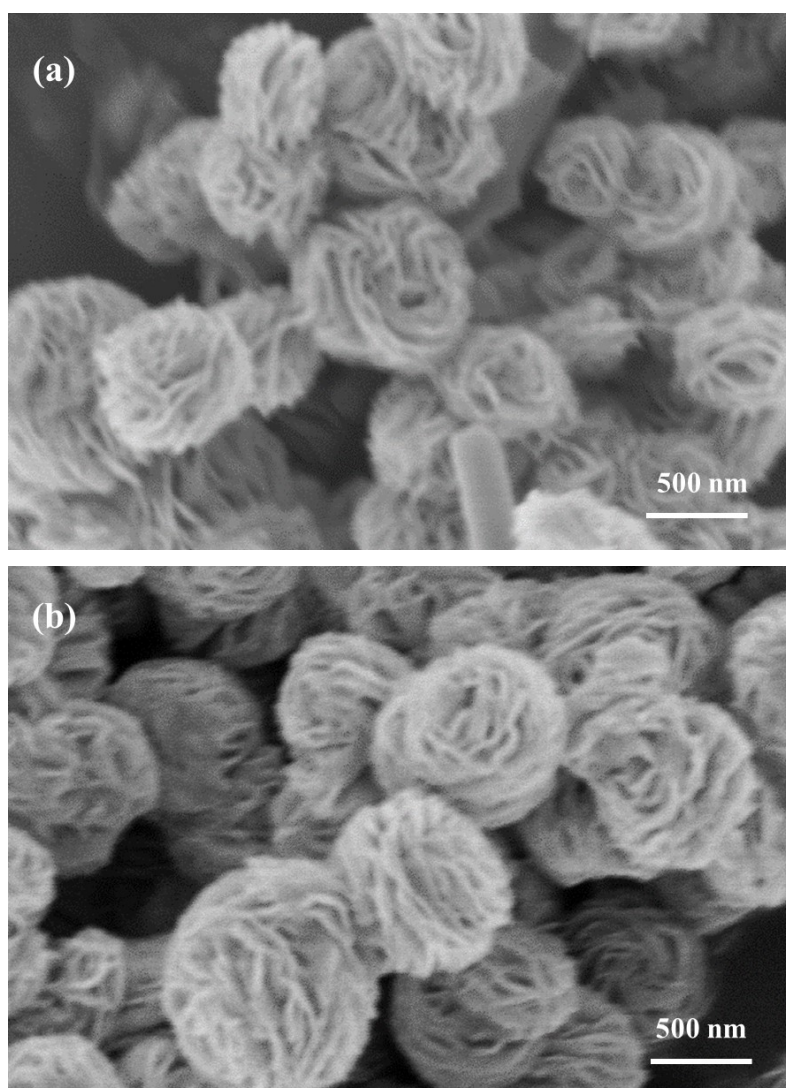

**Fig. S3.** SEM images of (a) MoS<sub>2</sub>-N<sub>2</sub>H<sub>4</sub>-2 and (b) MoS<sub>2</sub>-N<sub>2</sub>H<sub>4</sub>-8 catalysts.

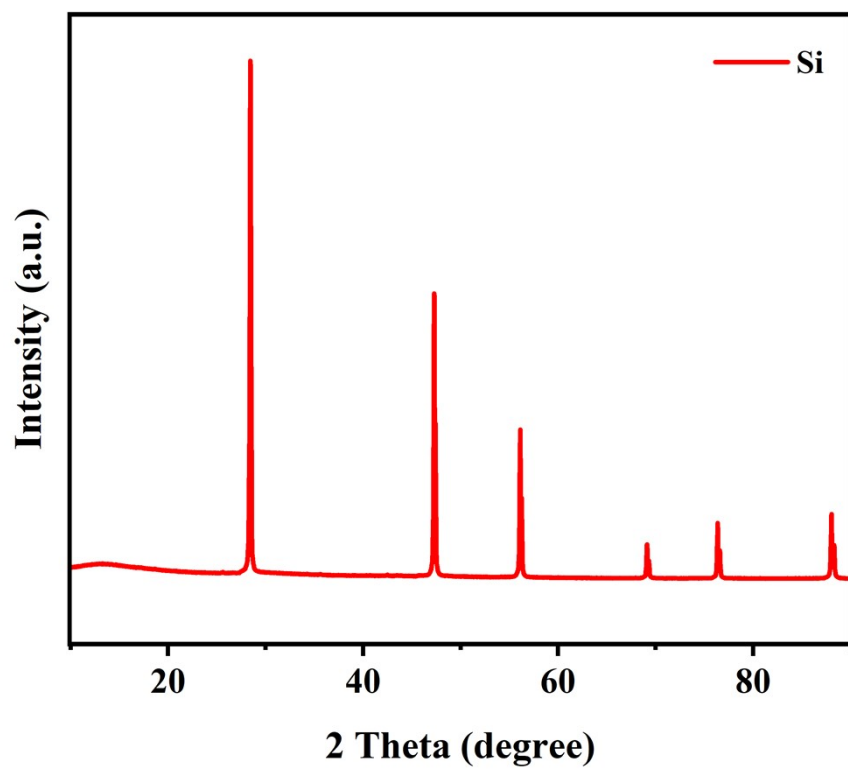

**Fig. S4.** XRD patterns of Si standard sample.

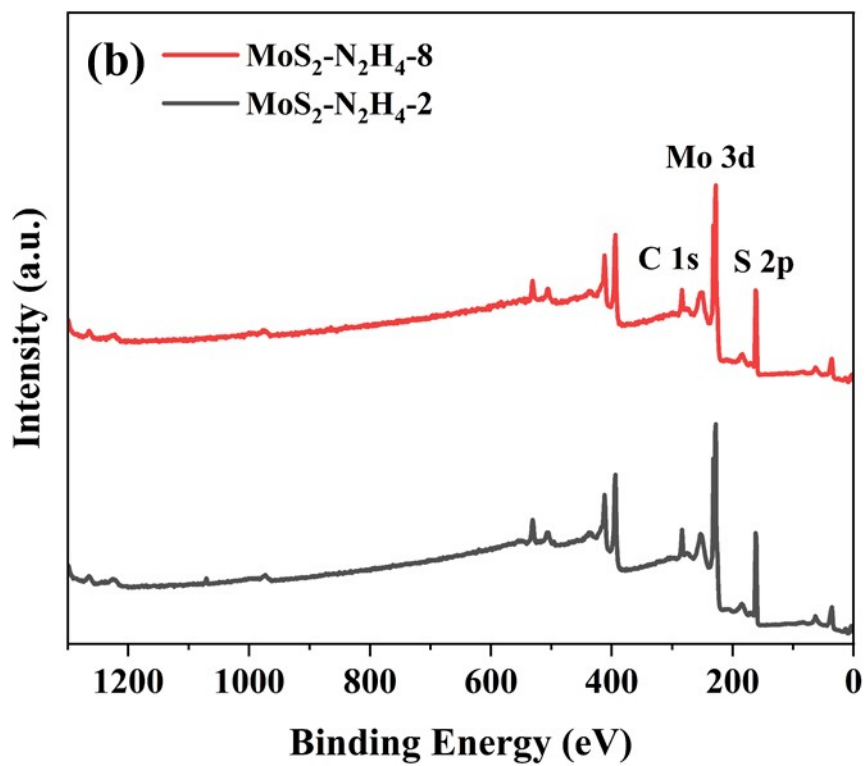

**Fig. S5.** The XPS survey spectra of MoS<sub>2</sub>-N<sub>2</sub>H<sub>4</sub>-2, MoS<sub>2</sub>-N<sub>2</sub>H<sub>4</sub>-8 catalysts.

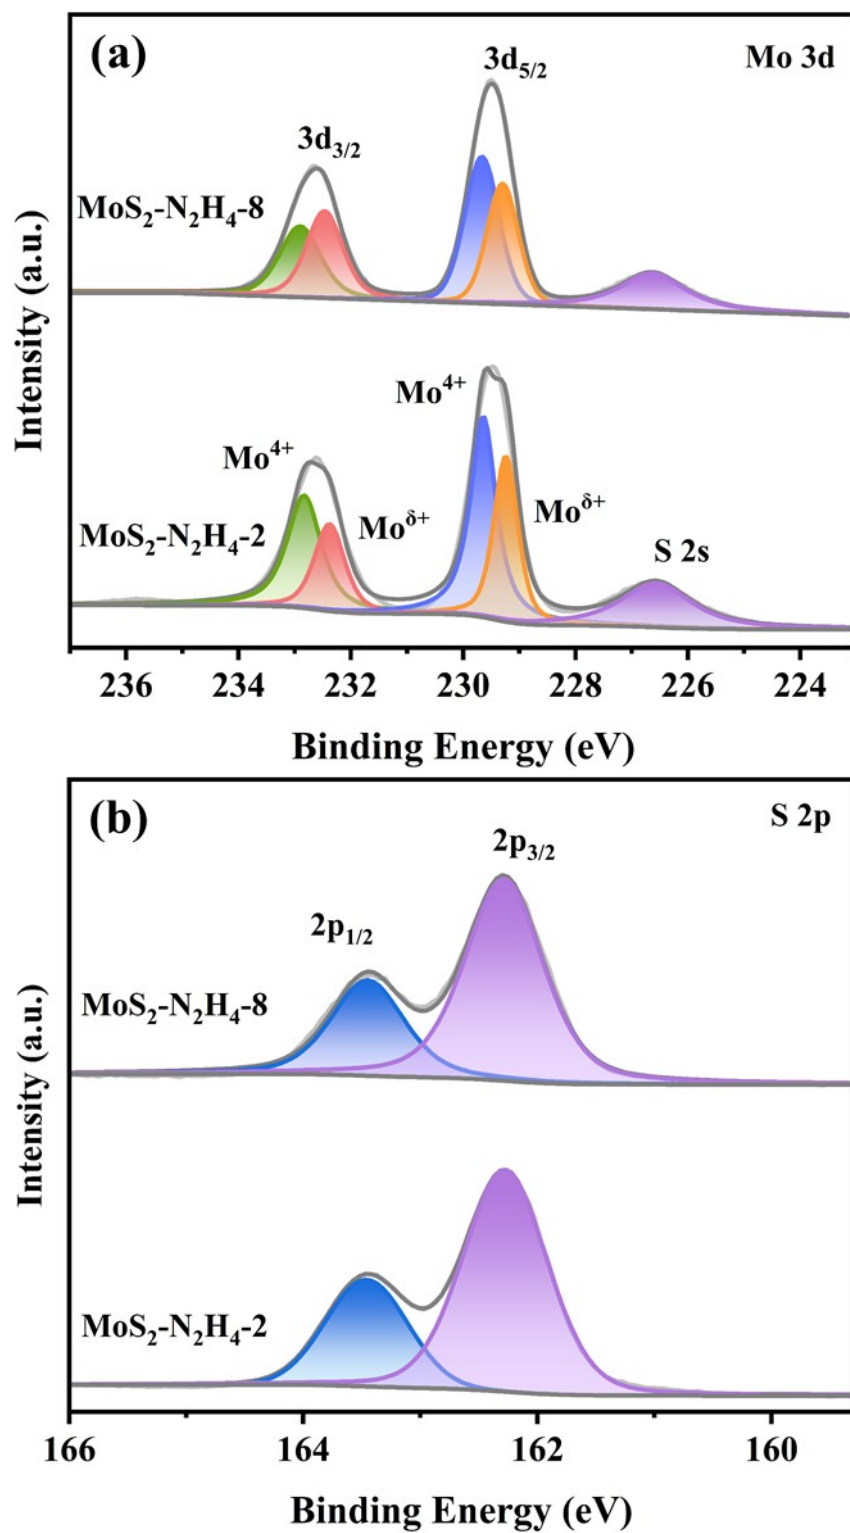

**Fig. S6.** XPS spectra of (a) Mo 3d and (b) S 2p states in MoS<sub>2</sub>-N<sub>2</sub>H<sub>4</sub>-2 and MoS<sub>2</sub>-N<sub>2</sub>H<sub>4</sub>-8 catalysts.

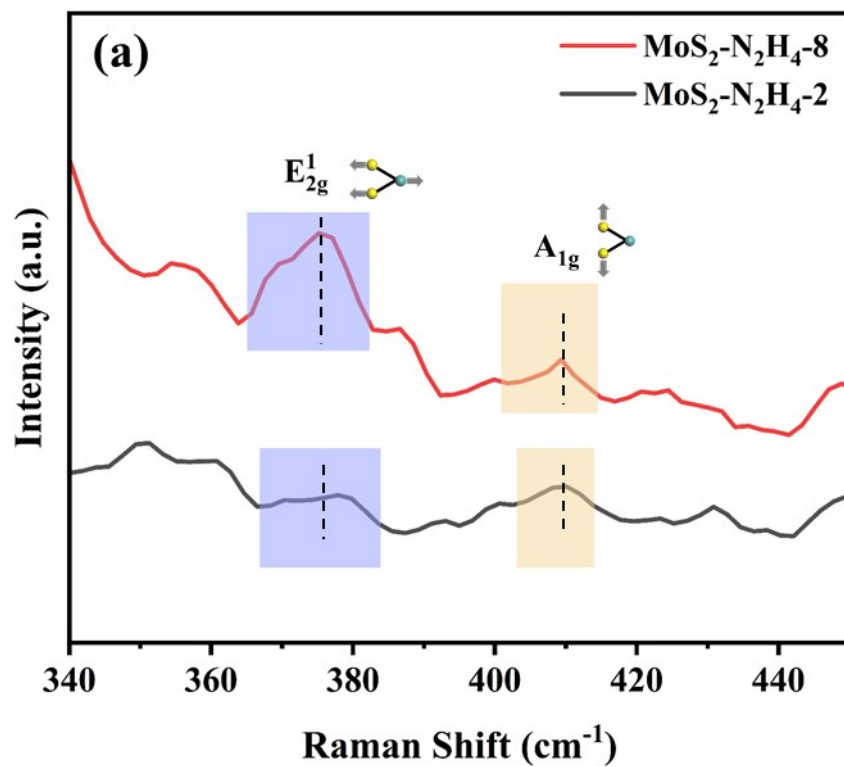

**Fig. S7.** Raman spectra of MoS<sub>2</sub>-N<sub>2</sub>H<sub>4</sub>-2 and MoS<sub>2</sub>-N<sub>2</sub>H<sub>4</sub>-8 catalysts.

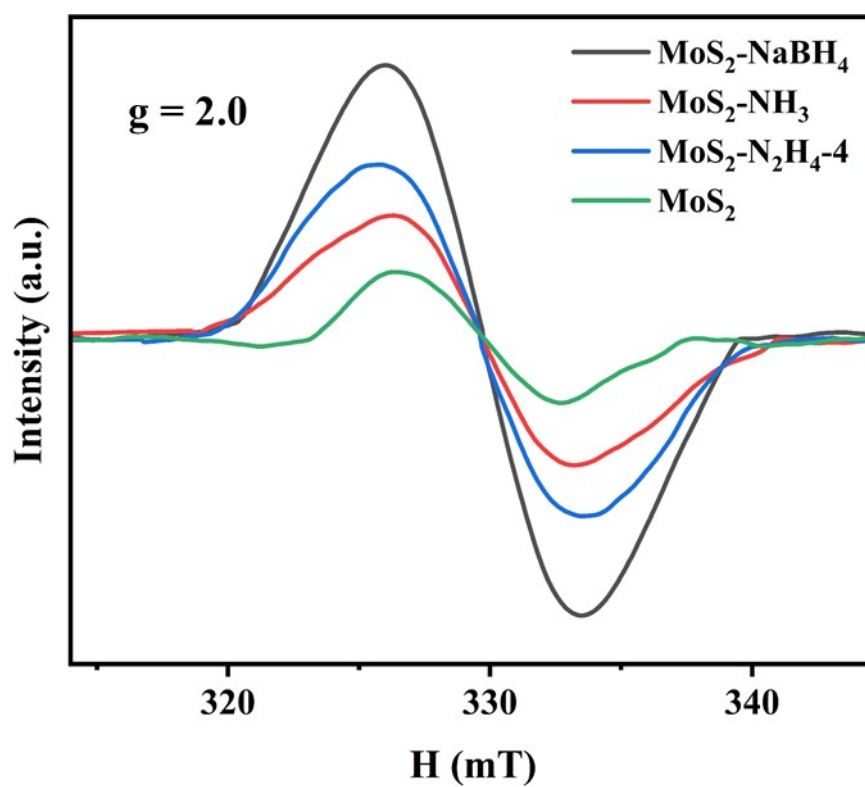

**Fig. S8.** The EPR spectra of  $\text{MoS}_2$ ,  $\text{MoS}_2\text{-N}_2\text{H}_4\text{-4}$ ,  $\text{MoS}_2\text{-NH}_3$  and  $\text{MoS}_2\text{-NaBH}_4$  catalysts.

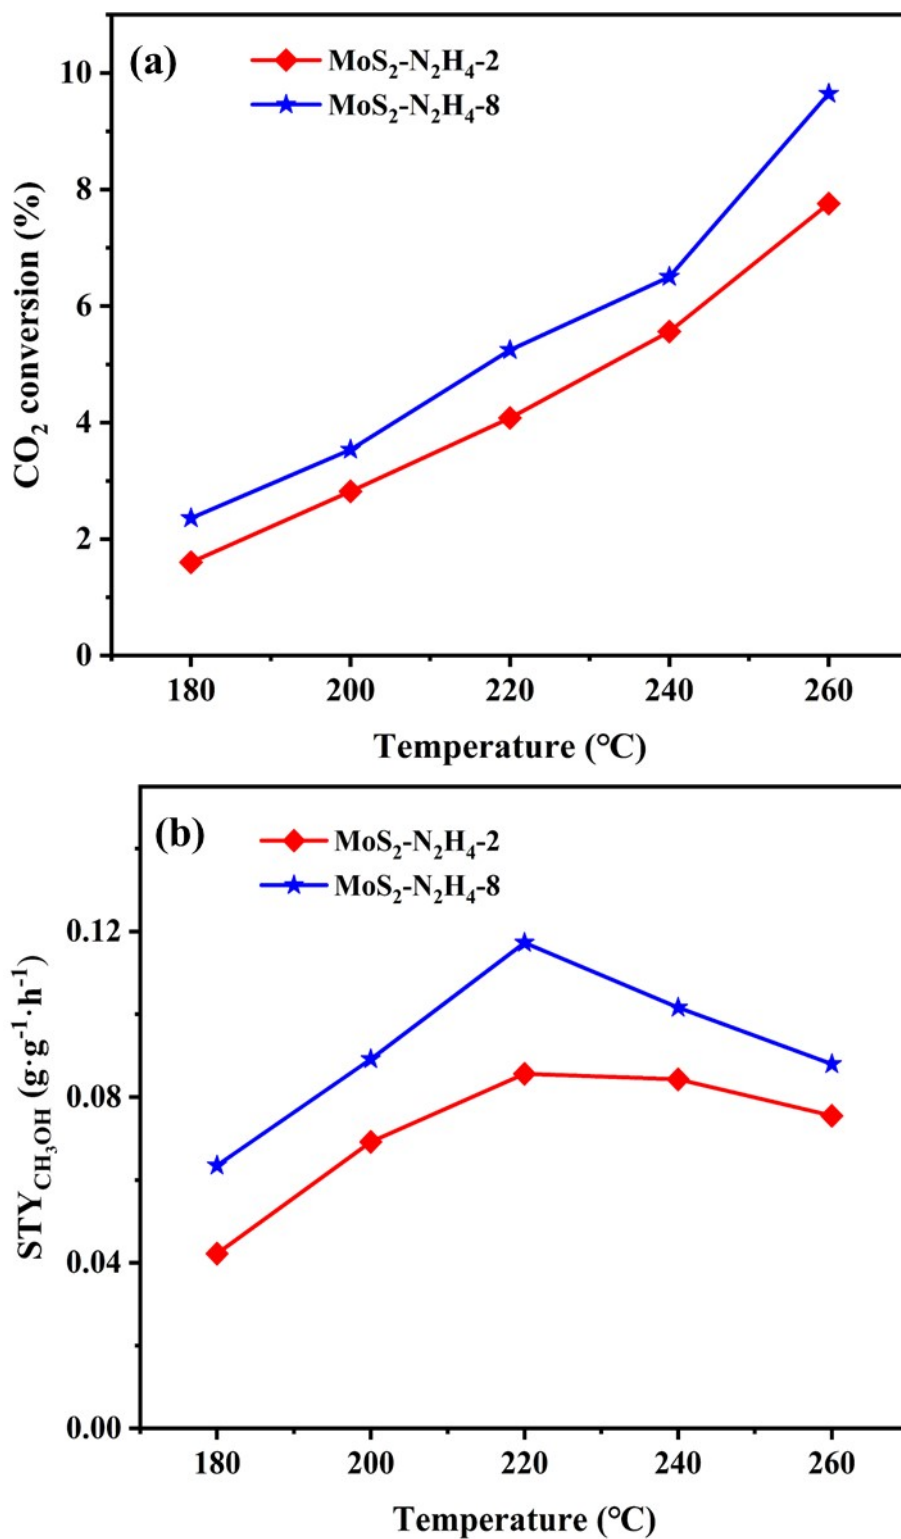

**Fig. S9.** (a) CO<sub>2</sub> conversion and (b) STY of CH<sub>3</sub>OH over MoS<sub>2</sub>-N<sub>2</sub>H<sub>4</sub>-2 and MoS<sub>2</sub>-N<sub>2</sub>H<sub>4</sub>-8 catalysts. Reaction conditions: V<sub>CO<sub>2</sub>/H<sub>2</sub></sub> = 3/1, GHSV = 8000 mL·g<sub>cat</sub><sup>-1</sup>·h<sup>-1</sup>, P = 4.0 MPa.

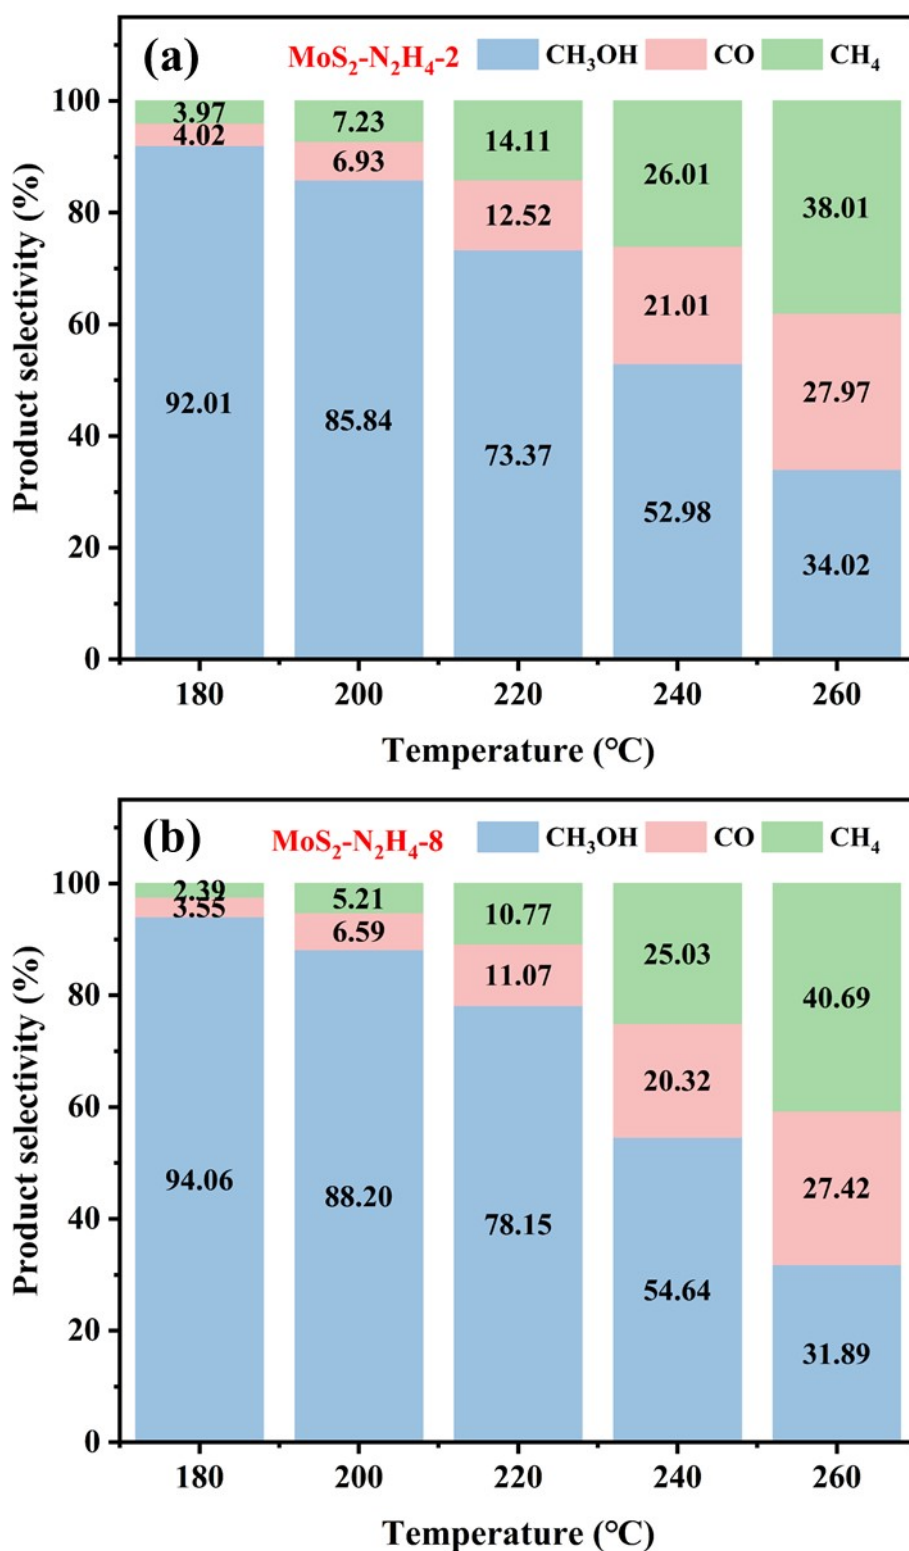

**Fig. S10.** Product selectivity over (a)  $\text{MoS}_2\text{-N}_2\text{H}_4\text{-2}$  catalyst and (b)  $\text{MoS}_2\text{-N}_2\text{H}_4\text{-8}$  catalyst. Reaction conditions:  $V_{\text{CO}_2/\text{H}_2} = 3/1$ ,  $\text{GHSV} = 8000 \text{ mL} \cdot \text{g}_{\text{cat}}^{-1} \cdot \text{h}^{-1}$ ,  $P = 4.0 \text{ MPa}$ .

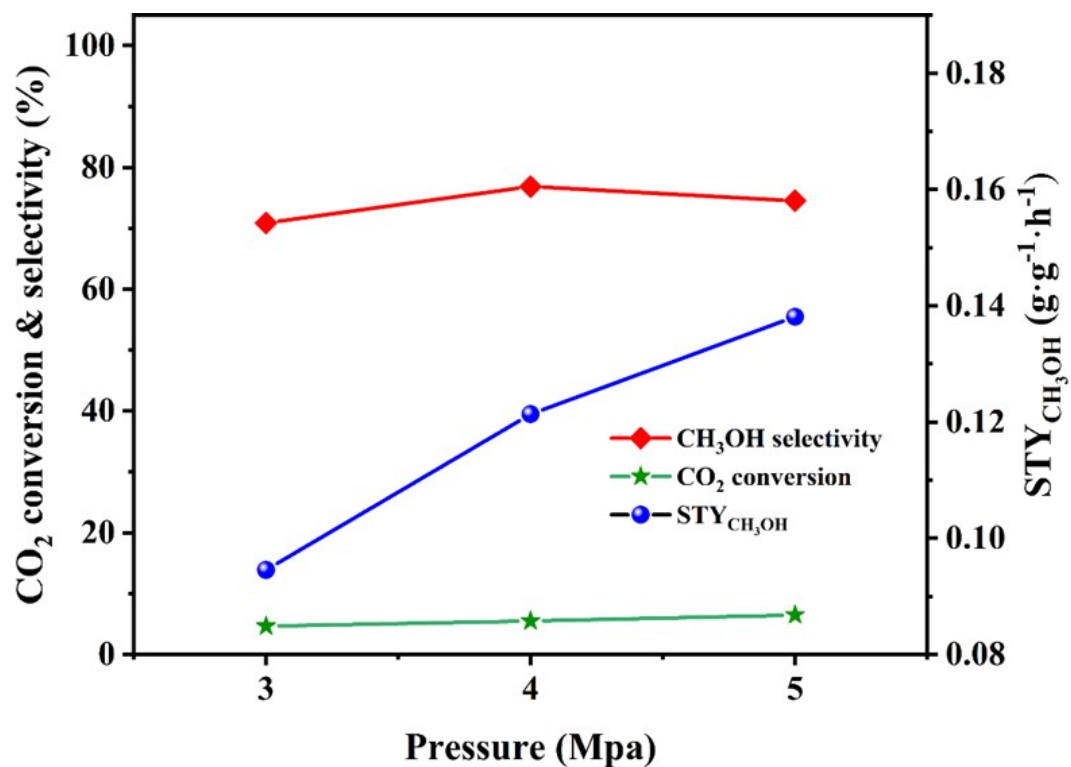

**Fig. S11.** Effect of pressure on CO<sub>2</sub> hydrogenation over MoS<sub>2</sub>-N<sub>2</sub>H<sub>4</sub>-4 catalyst.

Reaction conditions: 220 °C,  $V_{\text{CO}_2/\text{H}_2} = 1:3$ , GHSV = 8000 mL·g<sub>cat</sub><sup>-1</sup>·h<sup>-1</sup>.

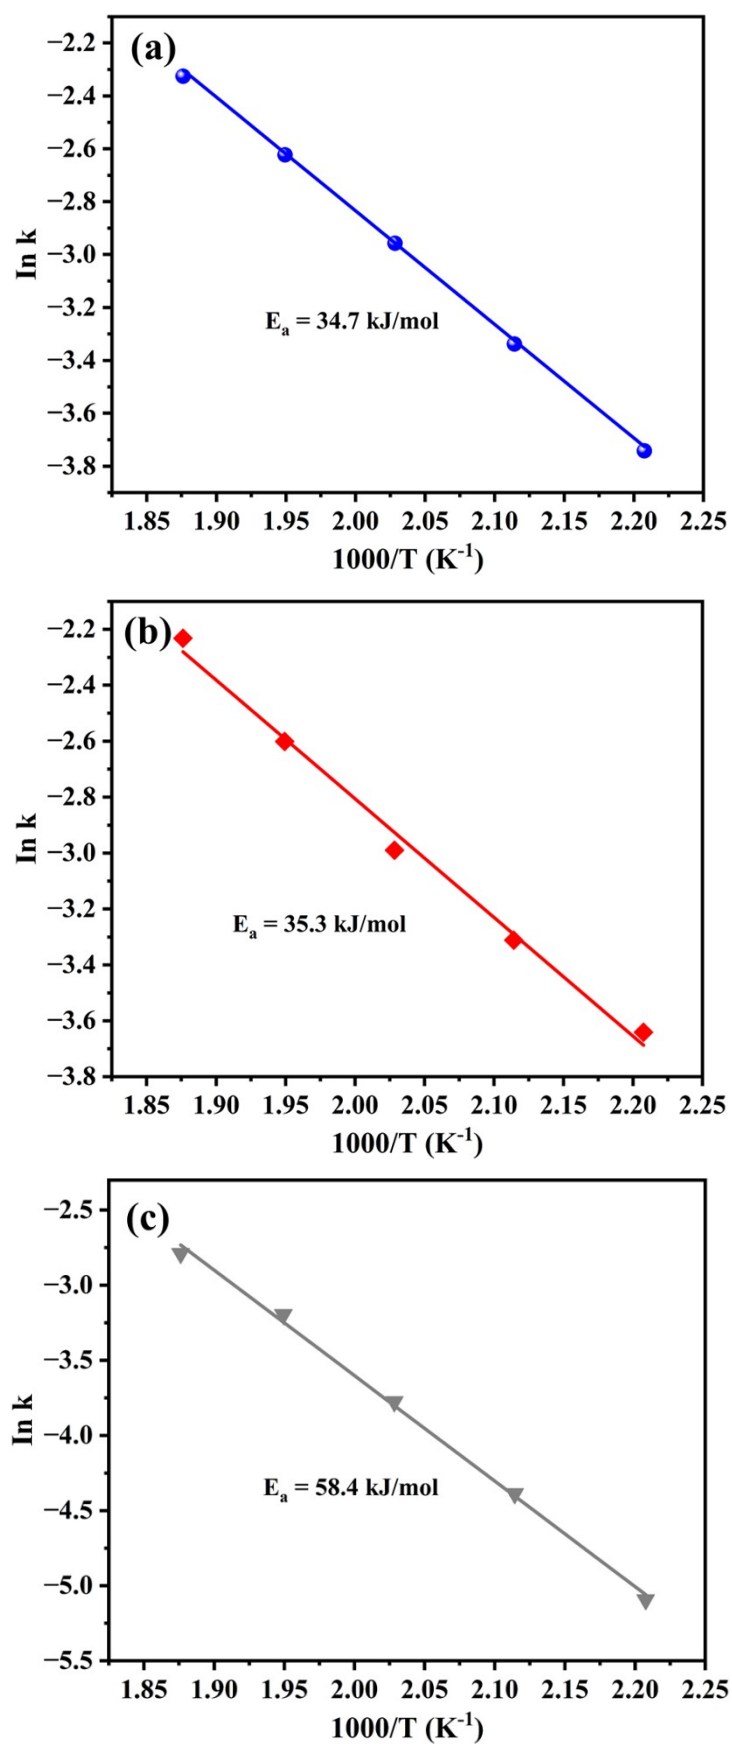

**Fig. S12.** Arrhenius plots and apparent activation energy of (a) MoS<sub>2</sub>-N<sub>2</sub>H<sub>4</sub>-4, (b) MoS<sub>2</sub>-NH<sub>3</sub> and (c) MoS<sub>2</sub>-NaBH<sub>4</sub> catalysts.

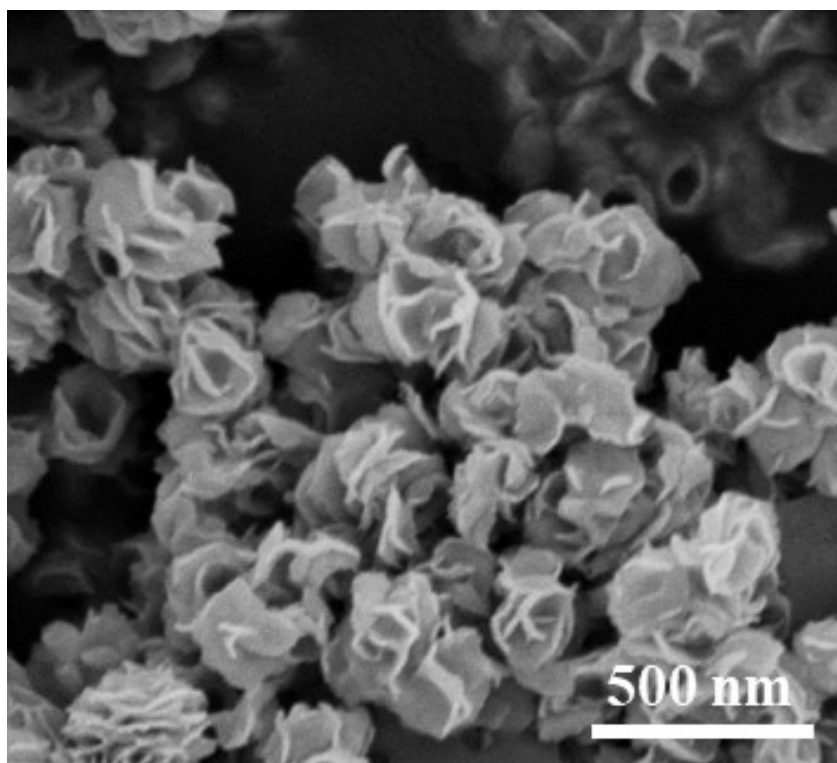

**Fig. S13.** SEM image of MoS<sub>2</sub>-N<sub>2</sub>H<sub>4</sub>-4 catalyst after reaction.

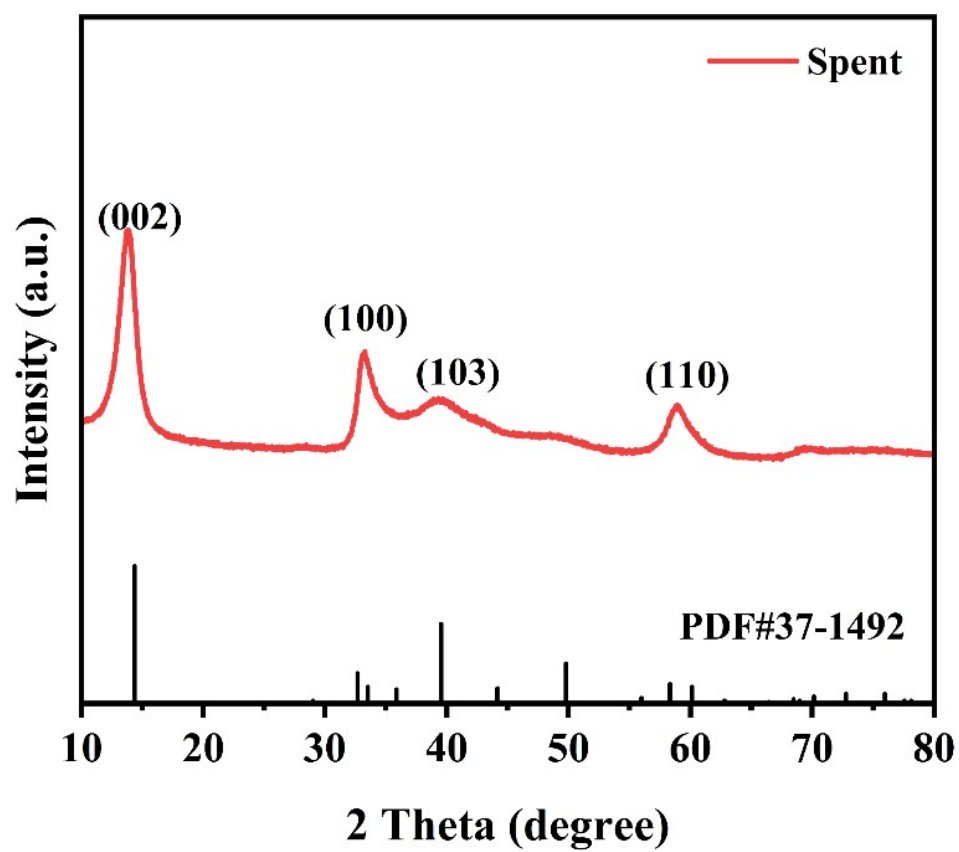

**Fig. S14.** XRD patterns of MoS<sub>2</sub>-N<sub>2</sub>H<sub>4</sub>-4 catalyst after reaction.

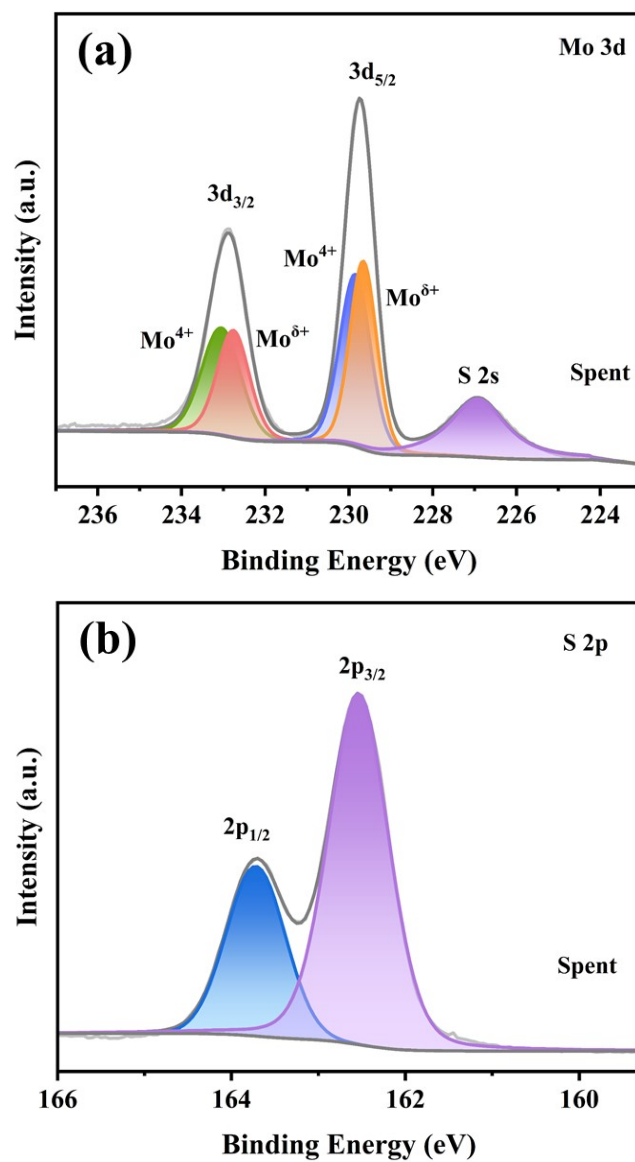

**Fig. S15.** XPS spectra of (a) Mo 3d and (b) S 2p states in MoS<sub>2</sub>-N<sub>2</sub>H<sub>4</sub>-4 catalyst after reaction.

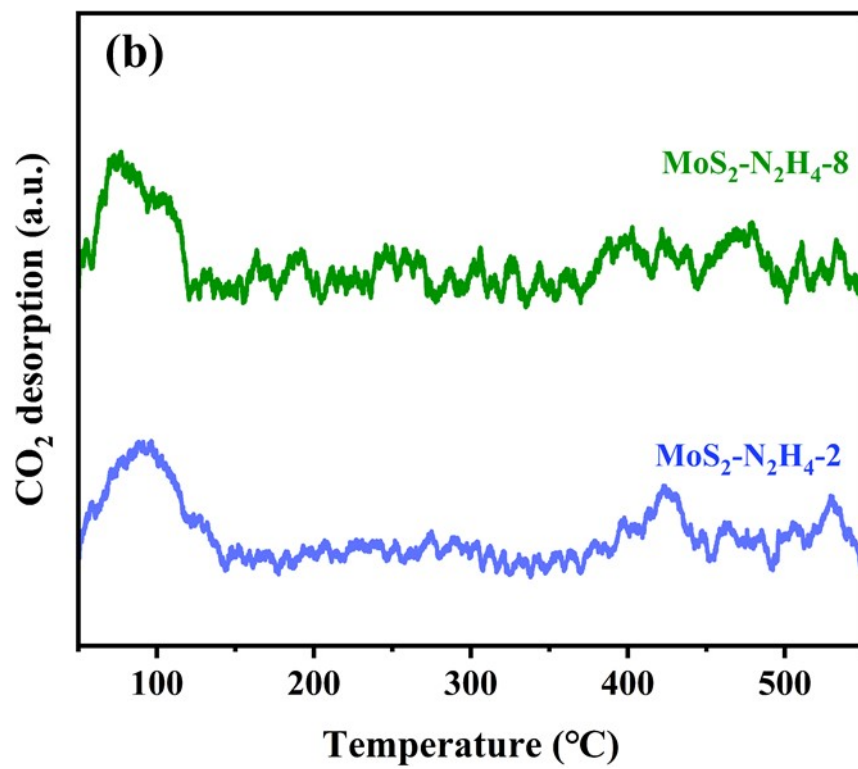

**Fig. S16.** CO<sub>2</sub>-TPD profiles of MoS<sub>2</sub>-N<sub>2</sub>H<sub>4</sub>-2 and MoS<sub>2</sub>-N<sub>2</sub>H<sub>4</sub>-8 catalysts.

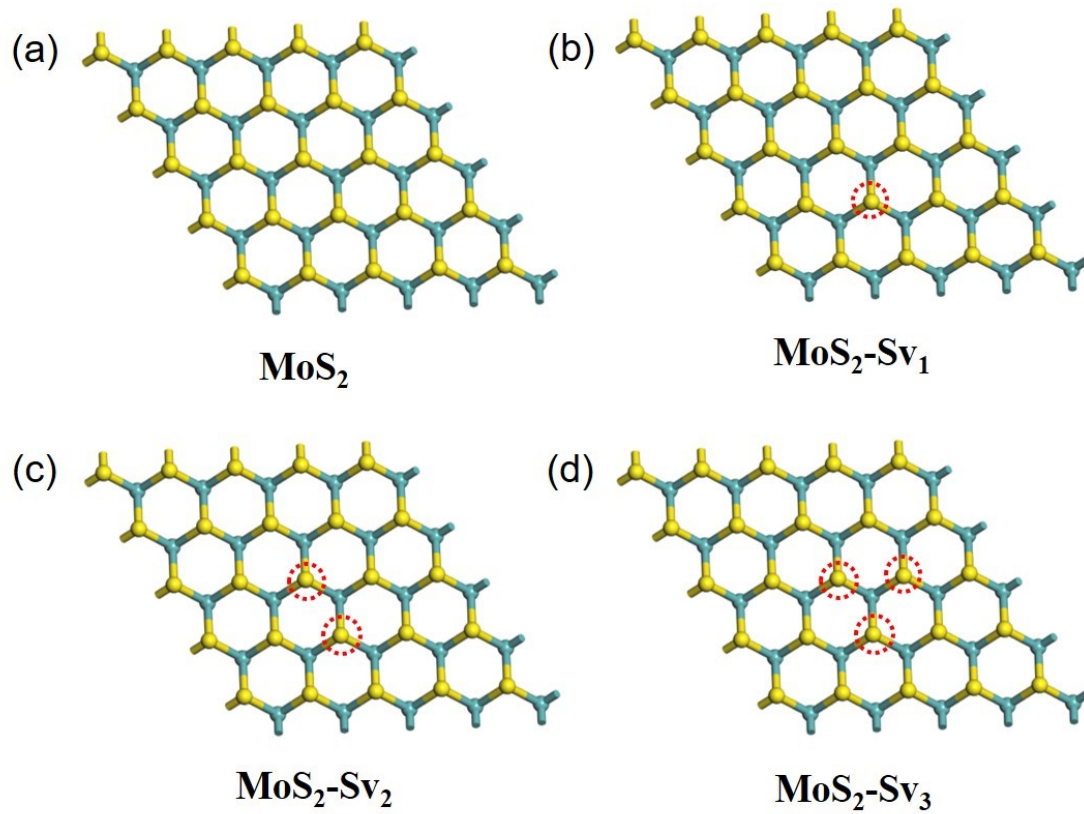

**Fig. S17.** DFT model of (a) MoS<sub>2</sub>, (b) MoS<sub>2</sub>-Sv<sub>1</sub> (c) MoS<sub>2</sub>-Sv<sub>2</sub> and (d) MoS<sub>2</sub>-Sv<sub>3</sub> catalysts.

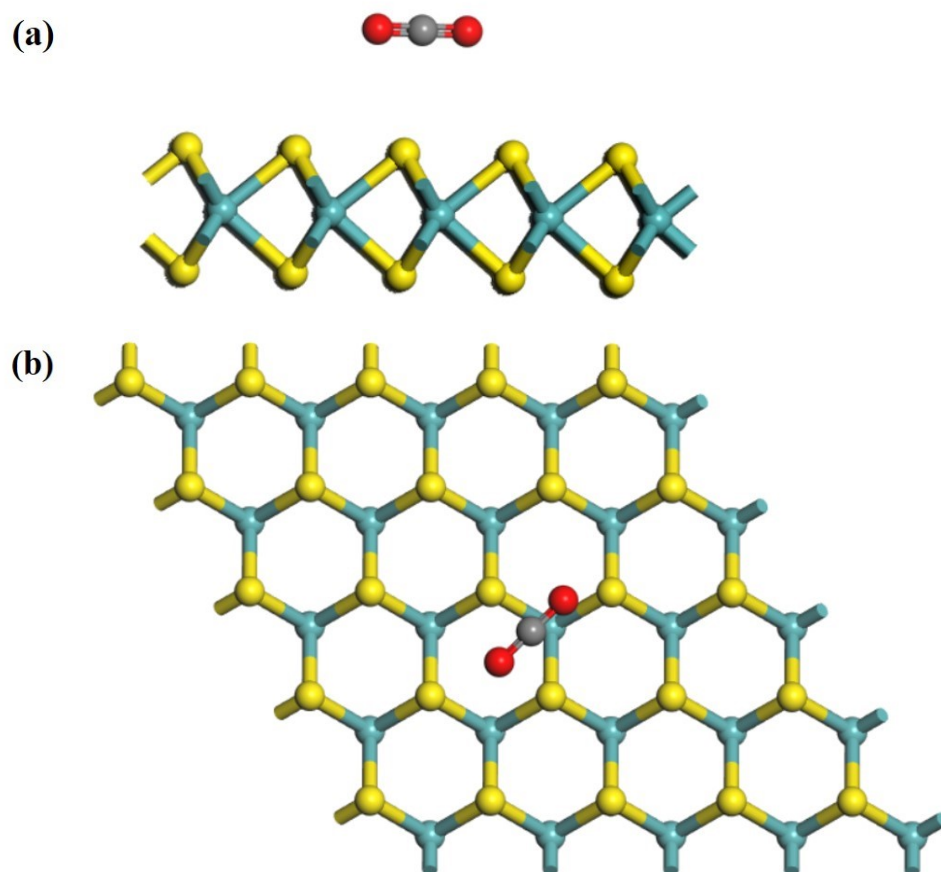

**Fig. S18.** Structural model diagram, (a) the side view and (b) the top view of CO<sub>2</sub> adsorption on MoS<sub>2</sub>. Color sign: S in yellow, Mo in cyan, O in red, C in black.

**Table S2** The catalytic performances of MoS<sub>2</sub>-N<sub>2</sub>H<sub>4</sub>-4 catalyst and the reported partial catalysts for CO<sub>2</sub> hydrogenation to methanol.

| Catalysts                                       | <i>T</i><br>(°C) | <i>P</i><br>(Mpa) | GHSV<br>(mL·g <sub>cat.</sub> <sup>-1</sup><br>h <sup>-1</sup> ) | CO <sub>2</sub><br>Conv.<br>(%) | CH <sub>3</sub> OH<br>Sel.<br>(%) | STY <sub>MeOH</sub><br>(g <sub>MeOH</sub> ·g <sub>cat.</sub> <sup>-1</sup><br>h <sup>-1</sup> ) | STY <sub>MeOH</sub><br>(g <sub>MeOH</sub> ·g <sub>MoS<sub>2</sub></sub> <sup>-1</sup><br>h <sup>-1</sup> ) | Ref. |
|-------------------------------------------------|------------------|-------------------|------------------------------------------------------------------|---------------------------------|-----------------------------------|-------------------------------------------------------------------------------------------------|------------------------------------------------------------------------------------------------------------|------|
| MoS <sub>2</sub> -N <sub>2</sub> H <sub>4</sub> | 220              | 4                 | 8000                                                             | 5.52                            | 76.8                              | 0.1214                                                                                          |                                                                                                            | This |
| MoS <sub>2</sub> -N <sub>2</sub> H <sub>4</sub> | 220              | 5                 | 8000                                                             | 6.48                            | 75.5                              | 0.14                                                                                            |                                                                                                            | work |
| FL-MoS <sub>2</sub>                             | 180              | 5                 | 3000                                                             | 12.5                            | 94.3                              | 0.132                                                                                           |                                                                                                            |      |
| FL-MoS <sub>2</sub>                             | 240              | 5                 | 15000                                                            | 11.0                            | 81.4                              | 0.49                                                                                            |                                                                                                            |      |
| ML-MoS <sub>2</sub>                             | 180              | 5                 | 3000                                                             | 8                               | 80.7                              | 0.074                                                                                           |                                                                                                            | [4]  |
| TL-MoS <sub>2</sub>                             | 180              | 5                 | 3000                                                             | 1.6                             | 87.9                              | 0.016                                                                                           |                                                                                                            |      |
| h-MoS <sub>2</sub>                              | 240              | 5                 | 6000                                                             | 16                              | 50                                | 0.28                                                                                            |                                                                                                            |      |
| h-MoS <sub>2</sub> /ZnS                         | 260              | 5                 | 6000                                                             | 15.8                            | 65.1                              | 0.17                                                                                            |                                                                                                            | [5]  |
| MoS <sub>2</sub> /Ni0.2                         | 260              | 5                 | 12000                                                            | 1                               | 83.76                             | -                                                                                               |                                                                                                            |      |
| MoS <sub>2</sub> /Co0.2                         | 260              | 5                 | 12000                                                            | 0.5                             | 73.82                             | -                                                                                               |                                                                                                            | [6]  |
| 5%Cu-MoS <sub>2</sub>                           | 220              | 4                 | 12000                                                            | 3                               | 80                                |                                                                                                 | 0.15                                                                                                       |      |
| 5%Cu-MoS <sub>2</sub>                           | 220              | 5                 | 12000                                                            | 5.39                            | 85.95                             |                                                                                                 | 0.25                                                                                                       | [7]  |
| MoS <sub>2</sub> @SiO <sub>2</sub>              | 260              | 5                 | 8000                                                             | 11.1                            | 52.2                              |                                                                                                 | 0.165                                                                                                      | [8]  |

## References:

1. S. Zhou, W. Ma, U. Anjum, M. Kosari, S. Xi, S. M. Kozlov and H. C. Zeng, Nat. Commun., 2023, **14**, 5872.
2. X. Ma, L. Diao, Y. Wang, L. zhang, Y. Lu, D. Li, D. Yang and X. She, Chem. Eng. J., 2023, **457**, 141116.
3. G. Kresse and J. Hafner, Phys. Rev. B, 1994, **49**, 14251-14269.
4. J. T. Hu, L. Yu, J. Deng, Y. Wang, K. Cheng, C. Ma, Q. H. Zhang, W. Wen, S. S. Yu, Y. Pan, J. Z. Yang, H. Ma, F. Qi, Y. K. Wang, Y. P. Zheng, M. S. Chen, R. Huang, S. H. Zhang, Z. C. Zhao, J. Mao, X. Y. Meng, Q. Q. Ji, G. J. Hou, X. W. Han, X. H. Bao, Y. Wang and D. H. Deng, Nat. Catal., 2021, **4**, 242-250.
5. S. Zhou and H. C. Zeng, ACS Catal., 2022, **12**, 9872-9886.

6. Y. Yuan, L. Qi, Z. Gao, T. Guo, D. Zhai, Y. He, J. Ma and Q. Guo, *Molecules*, 2023, 28, 5796.
7. Y. Zhou, F. Liu, S. Geng, M. Q. Yao, J. Ma and J. X. Cao, *Mol Catal*, 2023, 547, 113288.
8. S. Zhou, W. Ma, U. Anjum, M. Kosari, S. Xi, S. M. Kozlov and H. C. Zeng, *Nat. Commun.*, 2023, 14, 5872.
